# Supplementary material for: Clinical Course and Outcomes among COVID-19 Patients at the Hospitel in Bangkok: A Retrospective Study
Source: MDPI journal article supplement (doi:10.3390/tropicalmed7090238), 2022-09-10
Supplement: s1 [file s1]

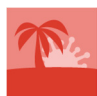

# Supplementary Materials: Clinical Course and Outcomes among COVID-19 Patients at the Hospital in Bangkok: A Retro- spective Study

**Table S1.** Rama Co-RADS: A tool used as an assessment scheme for chest X-ray findings to diagnose and monitor patients with COVID-19 pneumonia.

| Rama Co-RADS      | Likelihood of COVID-19 Pneumonia | Impression                                                                                                                                             | Chest X-ray Findings                                                                                                                                                                                                                                                                |
|-------------------|----------------------------------|--------------------------------------------------------------------------------------------------------------------------------------------------------|-------------------------------------------------------------------------------------------------------------------------------------------------------------------------------------------------------------------------------------------------------------------------------------|
| <b>Category 1</b> | Negative or very low             | Normal chest X-ray                                                                                                                                     | No abnormality detected.<br>Anatomical variants (e.g., breast implants, scoliosis, and old bony fractures)                                                                                                                                                                          |
| <b>Category 2</b> | Negative or very low             | Minor abnormalities unrelated to COVID-19 pneumonia                                                                                                    | Features favoring minor technical issues (e.g., suboptimal inspiration, inadequate exposure) but not affecting film interpretation<br>Irrelevant abnormalities (e.g., old tuberculosis, mild cardiomegaly, aortic atherosclerosis)                                                  |
| <b>Category C</b> | Low                              | Low probability or atypical for COVID-19 pneumonia, but with other clinically important diseases requiring clinical correlation and further management | Other clinically important diseases (e.g., bacterial pneumonia, active tuberculosis, congestive heart failure, pneumothorax, pleural effusion, malignancy)<br>Presence of severe technical artifacts affecting image interpretation and requiring repeated or follow-up chest X-ray |
| <b>Category 3</b> | Moderate                         | Equivocal/unsure/indeterminate for COVID-19 pneumonia                                                                                                  | Some features (e.g., subtle, poorly defined opacities) that may represent early/mild/atypical COVID-19 pneumonia or other causes (e.g., pseudolesions, other diseases) requiring clinical correlation and follow-up chest X-ray                                                     |
| <b>Category 4</b> | High                             | Suspicious for early/mild COVID-19 pneumonia                                                                                                           | Single or multifocal, poorly defined ground-glass opacities or consolidations in unilateral lung                                                                                                                                                                                    |
| <b>Category 5</b> | Very high                        | Typical for COVID-19 pneumonia                                                                                                                         | Multifocal peripheral opacities (ground-glass opacities and/or consolidations), including those with rounded morphology, in bilateral lungs                                                                                                                                         |

Adapted from Suwatanapongched et al., 2021 [14].
